# Supplementary material
Source: publisher figshare collection journal article supplement (https://sage.figshare.com/ndownloader/files/18613844)
Supplement: Supplementary file 1 [file 18613844]

## Sheet: Sheet1
time	sex	age	rytj	hosday	dtype	sericompli	tothosexp
1	2	57	2	8	2	0	9396.74
1	1	49	3	5	1	0	2857.16
1	2	50	3	7	1	0	4762.72
1	1	43	3	21	1	1	9201.05
1	1	43	3	10	2	0	10399.2
1	1	56	3	5	1	1	2276.23
1	1	58	2	9	1	0	6447.92
1	1	50	3	5	3	1	4420.94
1	2	48	2	8	1	1	3422.2
1	1	45	1	7	3	0	6452.59
1	2	45	1	23	3	0	28079.7
1	2	55	1	6	1	0	6617.98
1	1	49	1	12	3	1	50579.5
1	1	56	3	14	1	1	61099.8
1	2	47	3	5	3	1	3742.27
1	1	55	1	8	2	0	12563.5
1	1	47	1	11	1	1	36205
1	1	58	3	7	2	0	3726.9
1	1	55	1	6	3	1	5628.4
1	1	46	1	6	1	0	5451.66
2	2	48	2	7	3	1	3524.24
1	2	45	3	6	1	0	3142.32
1	1	56	2	13	3	0	13276.7
1	1	46	1	10	2	0	8742.04
1	1	52	2	8	3	0	6303.29
1	2	51	2	5	2	0	7763.61
1	2	51	3	5	1	1	4132.85
1	2	54	1	5	1	0	3894.97
1	2	57	3	5	1	1	1491.05
1	1	43	2	4	3	0	2474.15
1	2	56	3	9	3	0	5944.14
1	1	55	2	4	1	0	4435.65
1	2	48	2	11	3	1	6478.19
1	1	51	1	6	3	1	3541.91
1	1	43	1	10	2	0	9153.18
1	1	51	1	6	3	0	3437.14
1	1	49	3	10	2	1	7983.93
1	1	56	3	7	1	1	5583.2
1	1	47	2	9	1	1	7420.67
1	2	56	2	6	3	1	3743.7
1	1	58	3	4	1	0	2417.29
1	1	54	3	15	1	1	7031.29
1	2	57	2	6	3	1	2454.09
2	1	50	1	7	2	0	29236
1	1	56	3	10	2	1	11997
2	2	54	2	6	3	1	5080.61
4	1	58	3	7	1	1	2912.66
1	2	56	2	9	3	0	5114.01
1	1	54	2	14	3	1	8400.71
1	1	47	1	7	2	1	3665.71
1	1	54	2	5	2	1	2849.13
1	1	58	3	13	2	0	4619.83
1	1	57	3	15	1	0	4941.93
1	1	45	3	15	2	0	5049.18
1	1	52	1	10	3	1	6933.26
1	1	50	1	9	2	0	10948.5
1	2	57	1	7	3	1	4623.75
1	2	55	1	4	1	0	4623.52
1	1	54	3	11	1	0	4232.46
3	2	52	2	4	3	0	6430.33
1	1	54	2	8	3	1	5775.27
1	2	53	2	6	1	0	4801.35
1	2	58	1	8	3	1	6220.66
1	1	51	2	13	2	0	17970.4
1	2	58	1	7	3	0	4560.18
1	2	57	1	14	3	1	11217.6
1	1	49	1	5	1	0	2965.03
1	1	51	1	7	2	0	8355.35
1	1	55	2	8	1	0	33022.7
1	1	57	3	8	1	0	5573.69
2	2	56	3	10	1	0	3528.59
1	2	58	2	8	1	1	5690.65
1	1	57	1	12	3	1	7762.16
1	2	49	3	16	1	0	8791.33
1	2	52	3	6	1	1	2806.44
1	1	46	2	8	2	0	35074.1
1	2	54	2	7	3	0	1934.7
1	2	51	3	13	3	1	7852.72
1	1	54	2	7	3	1	4204.43
1	2	58	3	4	1	0	2179.49
1	1	50	3	14	1	0	4945.78
1	2	55	2	8	1	0	2392.74
1	2	55	3	4	1	0	3892.48
1	2	51	1	7	1	0	6807.34
1	1	58	2	22	1	0	102182
1	1	55	1	4	3	0	3011.88
1	1	58	2	11	2	0	42941
2	1	57	1	7	3	0	4756.45
4	1	49	3	10	2	1	7020.76
1	1	53	2	32	3	1	14938.6
1	1	50	1	5	1	0	5492.8
4	2	56	3	5	2	1	3782.43
1	2	57	2	8	1	1	1823.6
1	1	52	3	7	2	1	5555.13
1	1	46	2	14	3	1	10143
1	2	58	3	7	1	1	3517.61
1	2	55	3	7	1	1	3236.17
4	1	55	2	4	3	0	2147.71
1	1	37	1	7	3	0	3085.72
1	1	50	1	4	1	0	2883.46
1	2	51	3	14	1	0	7834.03
1	2	57	2	15	3	1	8706.55
1	2	52	3	13	1	0	5590.98
1	1	57	3	9	2	0	4044.38
1	2	54	1	5	1	0	4563.53
1	2	48	3	6	3	0	2831.86
1	2	50	3	10	3	1	5483.4
1	1	57	1	7	1	0	6150.81
1	2	58	2	8	3	1	1663.86
1	1	57	3	13	3	1	7032.71
1	1	56	1	4	1	0	4310.9
1	1	57	3	7	2	0	6461.85
1	1	56	3	6	1	0	4221.8
1	1	52	1	6	3	1	6569.92
2	1	52	1	25	1	1	7425.27
1	1	56	3	6	1	0	3424.63
1	2	48	1	5	3	0	2674.46
1	1	52	2	8	3	1	5755.17
1	1	43	2	8	1	0	4648.41
1	1	46	2	6	3	0	6865.04
3	2	57	2	8	3	0	2628.57
1	2	54	3	9	2	1	5571.42
1	2	52	2	12	3	0	4104.47
1	2	56	1	14	1	1	5632.89
1	1	55	3	12	2	1	6159.15
1	2	55	3	12	1	0	5283.79
1	1	42	1	5	1	0	6040.77
1	1	46	1	5	1	0	4111.49
1	1	51	3	6	2	0	4803.33
2	1	58	3	9	3	0	6252.2
1	1	41	3	4	1	0	1944.95
1	1	53	2	5	1	1	3551.35
1	1	56	1	7	2	0	5143.99
1	2	56	2	23	3	1	21307.6
1	1	51	2	6	2	1	2972.6
1	2	57	2	9	3	1	5770.11
1	1	42	3	5	1	0	4470.41
1	2	54	1	4	1	0	5429.72
1	1	58	3	14	1	0	7623.29
1	1	57	1	4	1	0	3242.07
1	1	51	2	7	2	0	6586.74
1	2	49	3	8	3	0	4921.93
1	2	46	3	5	3	0	3845.64
1	2	51	2	4	2	0	4370.99
1	2	57	2	6	1	1	3781.55
1	2	49	2	13	3	0	9212.51
3	1	57	2	9	3	1	2813.9
1	2	57	2	8	3	0	4656.24
1	1	53	1	13	2	0	8630.3
1	2	57	3	8	1	1	4363.06
1	2	54	3	7	1	0	3115.37
1	2	57	3	8	3	1	9254.2
1	2	53	1	5	1	1	3657.51
1	1	38	3	21	1	0	2080.55
1	1	53	3	21	2	0	15687.8
2	1	46	2	8	1	0	61598
1	1	42	3	8	3	0	3921.24
1	2	48	1	9	3	1	3722.06
1	1	55	3	11	2	0	11670.6
1	1	48	1	7	1	0	7080.93
1	2	58	2	8	1	1	4025.7
1	2	57	1	11	2	0	55422.7
1	1	52	2	6	2	0	7152.5
1	2	52	1	38	1	1	2229.9
1	2	58	2	8	3	1	4746.69
1	2	54	2	7	1	1	4891.1
1	2	48	2	5	1	0	3436.99
2	1	44	3	5	1	0	1900.33
1	1	57	1	8	3	0	3921.55
1	2	36	1	9	1	1	3588.81
1	1	53	2	16	3	1	18211.5
1	1	58	3	12	2	1	11647.8
4	1	58	3	10	2	1	5143.49
4	2	54	2	4	3	0	1839.6
1	1	45	2	4	2	0	3246.48
1	2	52	1	9	3	1	5333.83
1	1	50	1	6	3	1	3575.01
1	1	51	1	4	1	0	4652.26
1	1	58	2	8	3	0	6741.13
1	1	56	1	9	3	0	6651.36
2	2	58	3	4	3	0	3268.91
1	2	57	1	5	1	0	5398.79
1	2	55	2	21	1	1	8560.63
1	1	44	3	11	2	1	6394.92
1	2	57	3	5	3	1	3025.26
1	1	40	1	9	1	0	7800.24
4	1	45	2	5	3	0	1546.87
2	2	58	1	7	1	0	5522.89
1	1	47	1	18	2	0	43226.8
1	2	43	3	4	3	0	1093.92
2	2	54	2	8	3	0	11671
3	1	52	3	7	3	0	3086.99
3	2	55	1	6	3	0	3282.6
2	2	54	2	5	3	0	2991.59
1	1	57	3	6	1	1	2917.94
1	1	57	2	14	2	0	5318.35
1	1	41	2	4	3	1	1499.21
1	1	54	2	8	2	0	12316.8
1	2	48	3	6	3	0	2624.17
1	1	51	2	11	1	0	8097.63
1	1	43	3	15	1	0	6655.88
1	1	57	2	10	3	0	3902.61
1	2	53	2	13	3	0	6427.83
1	2	53	2	8	3	1	4913.72
1	1	56	3	7	1	1	5001.83
1	1	37	3	7	3	0	1749.73
1	1	48	2	15	2	0	15761
1	1	58	2	6	3	0	3477.45
5	1	40	2	8	3	0	4668.51
1	1	58	1	11	3	0	8075.39
1	2	55	2	6	1	0	3690.36
1	1	42	1	10	3	0	10785.2
1	1	51	1	4	3	0	1750.8
3	2	57	1	7	2	0	4571.36
5	2	58	2	6	3	1	1540.78
1	2	55	1	6	3	0	6163.29
1	2	54	2	5	1	1	3348.8
1	1	58	3	6	1	0	3832.81
1	1	55	2	8	1	0	3019.52
4	1	46	3	10	2	0	9947.44
1	1	57	1	14	2	0	15986.5
1	2	54	3	12	1	0	4674.52
1	1	58	1	6	1	1	5335.71
1	1	45	3	7	2	1	11036
4	1	53	3	9	2	1	2915.54
1	1	39	1	13	2	0	15061.8
7	1	49	2	5	3	0	2817.05
1	2	49	3	5	1	0	3813.15
1	1	52	2	12	3	1	6324.15
1	2	54	2	31	1	1	26087.8
1	1	51	3	9	2	0	13484.7
1	2	55	3	19	1	0	9808.11
1	2	57	3	17	1	0	7651.64
1	1	51	2	6	1	0	6713.55
4	1	57	3	8	2	0	4404.71
1	2	57	2	7	3	1	2572.86
1	1	45	1	5	3	1	6864.98
1	2	47	3	6	3	1	3575.7
1	1	58	2	9	3	1	3940.13
1	2	58	2	9	3	1	5298.15
1	1	44	2	7	1	1	4826
1	1	46	2	10	3	1	5993.6
1	1	58	3	4	1	1	2175
2	2	58	1	10	1	0	9398.49
1	2	58	1	7	3	0	9269.42
1	2	44	3	17	1	0	5795.35
1	2	53	3	13	1	0	4945.22
1	1	57	2	12	1	0	5201.58
1	1	46	3	8	1	0	4717.91
4	2	39	3	6	3	1	2262.5
5	1	51	1	9	3	1	5587.11
1	2	54	1	8	1	0	4637.3
4	1	51	1	9	3	1	5822.54
10	1	49	1	7	1	0	3118.02
1	1	51	3	10	2	1	9994.77
1	1	48	1	7	2	0	11879.6
1	1	44	3	13	1	0	6037.9
3	2	56	2	8	3	0	7642.16
1	2	57	2	8	3	1	5185.3
1	2	57	3	8	2	0	3446.92
1	1	49	3	11	2	0	7593.43
1	1	58	2	5	3	1	4550.01
1	1	43	1	6	3	1	2365.73
4	1	51	2	6	3	0	2323.03
1	1	49	3	5	1	0	2994.55
1	2	56	2	7	3	1	43387.6
1	1	53	2	8	3	0	5847.65
2	2	47	2	19	1	0	36446.1
1	2	50	3	13	2	0	4562.29
1	2	46	2	13	3	0	3482.85
1	2	50	2	12	3	1	12060.7
1	2	57	2	14	3	1	9501.8
1	1	52	3	11	2	0	9007.79
1	2	58	1	13	2	0	8526.65
1	2	58	2	5	3	0	2726.15
1	2	57	3	4	1	0	4327.52
1	1	54	1	10	3	1	4363.49
1	2	57	3	14	1	0	4290.48
1	1	57	3	8	2	0	9168.08
1	1	57	3	6	1	1	4408.9
1	2	57	1	20	2	0	11664.8
1	2	57	1	4	3	0	2066.93
1	1	51	2	5	2	0	3938.1
1	1	47	1	8	3	1	3296.76
1	2	54	1	9	2	0	4706.85
1	2	47	3	7	3	1	5199.36
2	1	55	2	10	3	0	7133.64
1	2	52	1	6	1	0	5147.66
1	2	53	2	6	1	0	9298.58
1	2	56	2	4	1	0	2995.89
1	1	56	2	6	3	1	3085.98
1	2	57	3	9	2	0	9977.1
1	1	44	2	9	3	1	4110.1
1	1	53	2	10	3	0	8923.36
1	2	58	2	5	3	0	2932.18
1	1	47	2	11	3	1	11633.4
1	2	57	3	15	2	1	12844.7
1	1	58	2	7	1	0	3855.8
1	2	57	3	7	3	1	2587.06
1	1	58	3	8	1	1	4816.99
1	2	56	2	7	3	0	2532.75
2	2	25	1	5	3	1	5184.52
1	2	58	2	8	3	0	3998.32
2	1	49	1	8	1	0	7805.17
2	2	48	1	6	3	0	2846.71
1	1	51	1	6	3	1	5314.05
1	1	58	3	9	1	1	5077.09
1	2	53	1	16	1	0	9897.33
4	2	56	3	5	3	1	5680.28
1	1	56	1	8	3	1	13795.3
1	2	52	1	9	3	0	6424.19
1	1	55	2	15	2	0	10231.8
1	1	54	1	7	1	0	6778.81
1	2	47	3	15	1	0	5970.9
1	2	55	3	5	3	0	3689.93
9	1	49	1	7	1	0	3406.73
1	2	58	3	10	1	0	4206.4
1	2	58	1	15	3	0	11210.1
1	2	48	3	13	1	0	3982.37
3	2	50	2	7	3	0	2195.89
1	2	53	2	10	3	1	3691.8
2	1	54	3	6	2	0	3589.93
1	2	39	2	6	3	0	8637.27
1	1	46	3	4	1	0	2458.62
1	2	56	3	15	2	0	5986.9
2	1	45	2	9	3	0	7832.45
1	1	57	1	9	2	0	12259.3
1	2	50	3	6	1	0	2996.22
4	1	57	2	6	3	1	2460.87
2	2	56	2	5	1	0	2698.63
1	2	55	2	7	1	0	4184.5
1	2	40	3	5	3	1	2888.6
1	1	57	3	13	2	0	19157.8
4	1	58	3	7	2	1	2744.33
1	2	49	3	4	1	0	2890.71
1	1	46	3	15	2	0	8677.22
1	1	54	2	13	3	0	6805.85
1	1	48	2	9	3	0	3226.94
1	2	56	1	5	1	1	3137.98
1	1	48	2	6	2	0	3402.12
1	2	57	3	11	1	1	3460.5
1	1	44	1	7	2	0	2942.7
1	2	51	1	8	3	0	7267.52
1	2	57	3	5	3	1	3834.03
2	2	57	3	15	3	0	4952.43
1	2	57	3	19	3	0	7165.74
1	2	49	3	6	1	0	4436
1	2	52	3	8	2	0	4025.97
1	2	54	3	6	3	1	3964.08
1	2	50	2	4	3	1	3587.75
1	2	58	3	7	1	0	3402.8
1	2	42	2	6	3	0	3481.65
1	2	54	2	4	3	1	3228.9
1	2	43	2	10	2	0	14863.5
3	2	57	2	13	1	0	4787.54
1	2	58	3	7	1	1	3180.55
1	1	57	3	8	2	0	4378.01
1	2	55	3	16	1	1	6977.37
2	1	53	1	5	3	1	2886.35
1	1	50	3	18	2	0	3549.8
1	2	54	1	7	3	0	3747.04
1	1	54	1	13	2	1	10232.2
2	2	39	2	6	3	1	3286.11
1	2	52	3	9	3	0	5548.92
1	1	52	2	19	3	0	13141.7
1	1	33	1	14	3	1	12224.2
1	2	38	2	5	3	1	5336.67
1	1	39	2	4	3	0	2322.57
1	2	52	3	7	1	1	3546.43
1	1	56	2	12	1	0	32424.4
1	2	51	3	12	2	0	11898.6
1	2	50	1	7	1	1	5916.19
2	2	54	1	5	1	0	1862.03
1	1	57	3	4	3	0	3072.14
1	1	56	3	10	1	1	5685.2
1	2	47	2	10	3	1	7324.07
1	1	49	3	13	1	0	4365.06
1	2	56	2	11	1	0	3346.33
1	2	47	3	14	2	0	7109.48
1	1	55	1	4	3	0	3801.7
1	1	40	1	9	2	0	14260.9
4	2	57	3	11	2	0	13459.9
1	1	54	3	15	2	0	11083.2
1	1	58	2	8	3	0	5616.2
1	2	58	1	8	3	0	4454.7
1	1	53	3	4	3	0	3047.85
1	2	54	3	12	1	0	5581.85
1	1	43	3	7	1	1	4143.04
1	2	50	2	11	3	1	9331.43
1	1	54	3	5	3	0	3915.84
2	1	58	1	6	1	1	4963.32
1	1	52	1	11	3	0	7809.05
4	1	50	3	6	3	0	3287.53
1	1	45	2	8	1	1	9753.91
1	1	46	3	10	1	1	2334.45
1	2	50	2	5	3	1	4395.25
1	2	47	1	13	3	0	12315.8
1	2	50	3	14	1	0	5708.7
1	2	55	3	14	1	0	5849.47
1	2	49	2	7	2	1	4434
1	2	57	3	11	3	1	4858.56
1	1	52	2	7	3	0	5922.48
1	1	42	1	13	3	0	12537.7
1	1	41	1	8	1	1	4602.64
1	2	58	2	5	3	1	2370.08
1	2	58	1	6	1	0	7143.33
1	1	46	2	5	3	0	20825.7
1	2	58	3	5	3	0	1996.51
1	1	54	1	12	2	1	7804.12
1	2	58	3	12	1	1	4891.99
1	1	53	2	9	3	0	4860.83
3	2	53	1	6	1	1	2641.61
1	1	34	2	21	1	1	3860.23
1	2	58	1	11	1	0	8491.95
1	2	50	2	11	1	0	2523.53
1	2	57	1	6	3	0	6158.82
1	1	43	3	9	2	0	6703.53
9	1	49	2	9	3	0	3476.69
1	2	54	2	4	3	1	2926.44
1	2	56	1	9	3	1	3950.32
1	2	57	2	8	3	1	5029.5
1	2	49	3	9	1	0	6301.57
1	1	50	3	13	2	1	6930.89
2	1	58	2	4	3	1	1833.44
1	2	42	3	4	3	1	2763
1	2	49	3	9	1	1	4040.03
1	1	53	2	6	3	1	2522.94
2	2	49	2	7	3	0	3241.4
1	2	56	2	4	1	1	3344.7
1	2	58	3	14	1	0	5942.08
1	1	58	1	10	1	0	7341.03
3	1	58	2	8	2	0	7413.27
1	2	44	3	5	3	0	2951.89
1	1	56	3	10	2	0	8057.96
1	1	56	2	16	3	0	24700.7
1	1	50	2	9	3	0	3874.66
1	1	58	2	14	2	0	18187.2
2	1	38	2	4	3	0	1826.82
1	2	57	3	10	1	0	4516.85
1	2	44	1	4	3	0	2343.02
1	2	56	3	4	1	1	3415.1
1	1	35	2	5	3	0	4243.64
1	1	55	2	10	2	0	13827.9
2	2	51	2	5	3	0	2250.9
1	2	57	2	4	1	1	2752.1
1	2	54	3	20	1	0	7868.5
1	2	55	1	7	1	0	6520.48
1	2	57	2	7	3	1	2937.71
1	2	57	3	6	3	1	3705.91
3	1	48	3	6	3	0	4530.23
1	2	55	3	15	1	0	5519.03
3	1	58	2	8	3	0	6117.4
1	1	47	2	6	3	0	4256.45
1	2	58	1	6	3	1	3088.82
1	1	44	3	7	1	0	4563.96
1	1	58	3	5	1	0	3095.23
1	1	48	2	5	3	0	2964.95
1	1	57	3	5	1	0	1301.27
1	2	44	2	7	3	1	3056.86
1	1	48	3	16	1	0	5197.01
1	2	49	1	10	3	1	5825.38
1	1	55	3	8	2	1	4939.85
1	2	50	2	5	1	0	2277.2
1	2	52	3	8	1	1	8139.25
1	2	51	1	6	3	0	2525.81
1	1	48	3	4	1	0	2391.29
2	1	51	1	7	3	1	5501.6
1	1	40	3	8	2	0	13060.6
1	2	55	2	10	3	0	12270.4
1	2	48	3	7	1	0	3783.05
1	2	56	1	4	1	0	4574.47
1	2	54	2	12	1	1	5564.1
1	1	54	3	11	1	1	6545
1	2	56	3	17	3	1	8319.33
1	2	51	3	12	3	1	8319.56
1	2	55	3	5	3	1	2619.13
3	1	54	1	12	2	0	8499.84
1	1	45	2	8	1	0	2049.98
1	2	41	1	6	1	0	4707.77
1	1	47	1	20	3	1	20831.7
1	2	47	2	6	1	0	3051.47
1	1	48	3	10	1	1	3661.9
1	2	50	3	14	1	0	5627.06
2	2	56	2	4	3	0	2435.12
2	1	43	2	4	3	0	2604.89
1	2	51	3	9	3	1	4199.54
1	2	51	3	6	3	1	4235.38
1	2	44	3	14	2	0	5417.72
1	1	53	3	6	3	0	3374.01
1	2	54	1	4	3	1	3032.34
1	1	56	3	7	2	1	5782.86
1	2	52	2	11	3	1	9279.07
1	2	55	3	7	2	1	6036.02
1	1	58	2	11	3	0	15429.7
1	2	52	3	6	3	0	3357.08
2	2	43	1	5	3	1	1728.28
1	1	51	1	9	3	1	5448.76
1	2	55	3	6	3	0	3285.04
1	1	55	3	14	2	0	14940.8
1	2	57	2	7	3	1	6559.07
1	2	58	2	7	3	0	4714.74
1	1	52	2	8	3	1	4082.86
1	2	50	1	6	3	0	2859.73
1	2	58	3	6	3	1	4890.7
1	1	54	1	6	3	0	3676.94
1	2	56	2	7	1	1	3507.85
4	1	37	2	7	3	1	8436.4
1	2	57	3	6	3	0	2505.55
1	2	58	3	8	1	1	7173.53
1	1	56	2	7	2	1	3750.02
1	2	54	1	9	3	1	5185.19
1	1	48	2	5	3	1	4234.52
1	2	51	2	5	3	1	4164.14
6	1	37	2	8	3	1	3450.18
1	1	50	3	16	3	0	8587.48
1	2	44	3	4	1	0	4136.84
1	1	54	2	6	1	1	5584.94
1	2	49	2	4	3	0	5293.03
1	1	44	1	9	1	1	5747.92
1	1	54	3	10	3	1	6916.45
1	2	53	3	6	1	1	3928.49
1	1	45	1	7	3	1	6117.4
2	1	55	1	7	2	0	8079.95
1	1	55	1	14	2	0	10727.2
1	2	57	3	8	1	0	5603.32
1	2	57	1	5	1	0	6050.15
1	2	53	2	26	1	0	15085.8
1	2	56	2	7	3	1	2941.8
1	1	35	1	15	2	0	50196.3
1	2	56	1	7	3	0	5832.48
2	2	50	3	13	1	0	9158.58
1	2	43	1	6	3	0	4218.51
4	1	54	3	6	2	1	1956.95
1	2	50	2	7	3	1	6569.48
2	1	40	2	9	1	0	4259.91
1	1	56	3	9	2	1	6645.3
1	1	41	3	8	3	0	7615.57
1	2	51	3	8	1	0	4051.44
1	2	52	3	13	1	1	4641.56
4	2	56	2	7	3	0	2579.31
1	2	48	2	12	1	1	7121.8
1	2	58	3	10	1	0	4941.83
1	2	57	2	8	3	0	2800.38
1	1	44	3	12	1	0	4702.49
1	1	50	3	15	1	0	6800.1
1	2	48	3	9	2	0	5082.09
1	1	54	2	9	3	0	5192.91
1	1	56	1	4	3	0	2510.89
1	2	42	1	8	1	0	6858.75
1	1	54	1	5	3	1	3310.7
6	2	58	2	6	3	1	1899.46
1	1	53	2	12	2	0	44706.4
1	2	57	3	5	1	0	4264.33
1	2	54	2	4	3	0	3485.3
4	1	50	3	11	1	1	8901.84
1	1	51	1	11	2	0	7183.12
1	2	52	2	10	3	1	3545.33
1	2	44	2	31	3	1	19787.6
1	1	50	3	9	2	0	5144.88
1	1	55	1	12	2	0	15077.1
1	1	55	1	5	3	0	2481.82
1	2	44	3	8	3	1	4943.5
1	2	43	2	5	1	0	3883.42
2	1	51	2	6	3	1	2057.88
1	1	58	1	5	1	0	5840.35
1	1	40	3	5	2	1	4723.1
1	2	51	2	6	1	1	4792.93
1	1	51	1	16	2	0	96677.5
1	2	55	2	6	3	1	2073.6
1	2	51	1	8	3	0	4670.41
2	1	51	2	5	3	0	2932.97
1	1	45	2	10	3	0	10914.1
1	2	58	2	16	3	1	8401.9
1	1	51	3	6	2	0	1697.85
2	1	48	3	6	2	0	1911.06
1	1	52	1	6	3	0	4183.4
1	2	43	3	5	1	0	3446.72
1	1	56	2	7	2	1	4964.59
1	2	57	2	4	3	1	2681.34
1	2	55	1	9	3	0	7087.02
1	1	56	3	15	2	0	6022.01
1	1	55	1	6	3	1	2976.14
1	1	57	3	7	1	1	3658.7
1	2	56	2	6	3	0	3251.86
1	2	49	3	12	1	0	4527.9
1	2	52	2	18	2	0	45941.1
1	1	42	2	5	3	1	5314.33
1	2	53	3	7	1	0	3227.94
1	1	54	3	14	1	0	5293.54
1	1	30	1	12	3	0	9032.12
1	1	52	3	7	2	0	5541.31
1	2	49	3	11	1	0	6225.37
1	2	49	2	7	3	0	4035.77
1	2	58	3	7	3	0	3270.64
1	1	57	3	7	1	0	6535.7
1	1	51	2	6	1	1	58198.4
1	1	50	1	10	1	1	7023.96
1	2	48	2	22	3	1	9419
1	2	58	3	10	3	1	3580.47
1	2	49	2	13	3	0	5756.86
1	2	52	2	7	1	1	4119.6
1	2	54	2	6	3	0	2858.06
1	2	54	2	5	3	1	3281.7
1	1	47	3	9	1	1	4002.04
1	2	54	2	5	3	1	3963.23
1	2	48	3	15	1	0	8111.91
2	1	47	3	6	2	1	3295.56
1	2	46	2	7	1	0	3040.19
1	1	54	1	8	3	0	6071.71
1	2	50	3	10	1	1	4309.25
1	2	57	2	7	1	1	2010.7
1	1	53	2	4	3	0	2685.99
1	2	57	3	5	1	1	3055.36
1	2	47	1	4	3	0	2665.49
1	1	57	2	8	3	0	5056.13
2	1	43	2	8	3	0	4285.83
1	2	55	2	10	1	1	4492.6
12	2	51	2	6	3	0	2168.91
1	1	57	2	6	3	0	5000.24
1	2	49	1	22	1	0	39905.7
2	2	51	2	7	1	0	2816.28
1	2	56	1	9	3	1	6512.37
1	2	50	3	9	3	0	5668.77
1	1	57	2	7	1	1	3270.2
1	2	49	3	13	3	1	5499.77
1	1	45	1	8	3	0	7043.17
1	1	43	3	14	2	0	6606.48
1	2	57	3	13	3	0	4950.83
2	2	51	1	13	2	0	9399.22
1	2	50	2	4	3	0	1975.59
7	1	37	2	7	3	1	3505.15
1	2	57	2	10	1	0	5082.55
1	1	49	3	9	2	0	9970.56
1	1	35	2	5	3	0	1545.51
1	2	52	3	18	2	0	11322.1
1	1	56	1	11	3	0	8248.5
1	2	50	2	6	1	1	2995.5
1	2	51	1	12	3	0	11283
1	1	54	1	5	3	0	2996.24
1	1	57	3	5	2	0	4136.7
1	2	55	1	4	3	1	2151.11
1	1	54	1	10	3	0	5281.76
1	1	42	3	8	2	0	2672.17
2	1	55	1	6	3	0	3252.2
1	2	52	3	7	2	1	9435.95
1	2	56	2	5	3	1	3711.9
1	2	48	1	8	3	1	5658.54
1	2	53	3	9	1	1	4432.45
1	2	47	1	8	3	1	7206.98
2	1	52	2	9	3	0	6851.93
3	2	57	2	4	3	0	3329.35
1	2	57	3	11	1	0	4225.12
2	2	52	2	5	1	0	2936.46
1	2	58	3	10	1	0	5912.46
1	1	47	1	5	3	1	3023.93
1	2	56	3	14	1	0	6102.8
1	2	58	2	6	3	1	3547.62
8	2	58	1	5	3	1	2515.99
1	1	58	3	9	2	1	9423.17
1	2	58	2	5	1	1	3350.8
1	1	39	2	7	2	0	7759.84
1	1	41	2	13	3	1	5097.62
1	2	50	1	4	1	1	2765
1	2	50	1	7	3	1	3887.1
1	2	53	3	5	1	1	4776.81
1	2	58	1	10	3	1	7475.98
1	1	56	3	10	2	0	4330.86
1	2	56	2	4	3	0	2689.52
1	2	55	2	13	3	1	4662.08
1	1	43	2	14	2	0	15779.5
1	1	51	3	6	2	0	2826.86
2	1	48	1	10	1	0	5601.57
1	2	58	1	4	1	0	1784.86
2	2	56	2	6	2	0	3350.14
1	2	48	2	5	3	0	2792.92
1	1	56	2	8	3	0	4817.22
1	2	56	3	4	1	0	4137.29
2	2	57	3	7	1	0	4723.42
1	2	54	3	9	1	1	5999.8
1	1	53	3	7	2	0	9860.27
1	2	49	2	8	1	1	5202.5
1	1	43	2	11	1	0	6637.9
5	2	51	1	17	2	0	7576.69
3	2	51	2	15	1	0	7171.18
1	2	58	2	4	3	1	2056.07
1	1	57	3	6	1	1	1941.76
2	2	57	2	7	3	0	2610.39
1	2	50	1	5	1	0	3469.53
1	1	50	1	4	3	0	2462.91
6	1	49	2	7	3	0	2571.37
1	1	48	2	11	3	0	6110.46
3	2	47	2	11	3	1	3632.59
1	2	51	1	80	3	0	15159.3
1	2	54	2	5	1	1	2469.66
1	1	51	2	11	3	0	5799.84
1	1	41	2	9	2	0	13190.3
2	2	57	2	9	3	1	4186.03
1	2	45	3	6	3	0	2669.35
1	1	47	3	5	1	0	4208.11
1	1	56	1	6	2	0	4758.57
1	1	38	2	15	3	1	16865.9
1	2	54	2	4	3	1	4374.1
1	1	58	3	8	2	0	6057.76
1	1	58	1	7	1	0	5818.96
1	2	58	1	4	3	0	2284.63
1	2	52	1	4	3	1	3839.07
1	2	57	3	8	3	1	3618.28
1	2	55	3	4	1	1	5241.9
1	1	52	1	8	3	0	6606.46
1	2	54	3	15	1	0	5283.05
1	2	49	2	9	3	1	6814.2
2	1	35	1	4	3	0	1931.78
1	2	46	2	12	2	0	12214.4
1	2	58	3	6	3	0	3385.71
1	2	58	2	8	2	0	6792.36
1	1	56	2	4	3	1	2450.3
1	1	51	2	13	3	0	5452.38
1	2	58	2	13	1	1	4978.65
1	2	50	1	6	3	1	5788.94
1	1	47	3	8	2	1	8018.47
1	1	46	3	4	2	0	4504.68
1	1	44	1	5	3	1	4318.37
1	2	58	1	9	3	0	3663.05
1	1	57	2	6	1	1	5455.35
1	1	49	1	14	3	0	5667.17
1	1	58	1	10	2	0	8423.62
1	1	55	3	8	3	0	5242.57
1	2	55	1	9	3	0	11539.9
1	2	51	2	5	3	1	4404.57
1	1	55	1	4	3	0	2831.65
2	1	44	3	7	1	0	3088.97
1	1	36	3	11	2	0	12893
1	1	55	1	8	2	0	5691.26
1	2	58	1	18	3	0	19911.3
1	1	49	2	5	2	0	3968.9
1	2	48	2	5	3	0	3141.1
1	2	46	2	4	3	0	2990.48
1	1	55	3	5	1	1	4792.64
2	2	50	1	6	3	0	3151.96
1	2	50	1	8	3	1	4480.6
1	2	57	3	18	1	0	7674.56
1	1	58	2	5	3	0	3629.12
1	2	35	3	13	1	1	6754.68
1	1	49	1	21	3	0	6966.6
1	2	56	3	11	1	0	4675.76
2	2	58	2	13	3	0	4649.4
1	2	49	3	6	3	1	4970.96
1	2	50	3	10	3	1	8353.76
1	2	57	2	4	3	1	3463.7
1	1	56	3	12	1	1	4496.89
1	1	56	1	8	3	1	13052.8
1	2	49	3	7	2	0	13305.1
1	2	51	1	4	1	0	4269.8
1	1	48	1	8	2	0	2449.83
1	1	53	1	12	3	0	11296.3
1	1	47	1	7	1	0	4899.96
1	1	49	2	8	2	0	7417.6
1	2	50	1	6	1	0	6149.5
2	1	46	1	4	3	0	2859.4
1	1	54	1	4	1	0	2292.3
1	1	58	2	14	3	1	6686.4
1	2	49	3	5	1	1	3943.04
1	2	51	2	5	3	0	5913.38
1	2	55	1	7	1	0	6712.71
1	2	52	1	6	3	0	2778.19
1	2	51	2	6	3	1	3759.8
1	1	53	1	5	1	1	3675.39
2	2	55	3	18	1	0	7914.18
1	1	50	2	9	2	0	10538.9
1	1	56	1	12	2	0	71496
1	2	55	1	4	1	0	2894.3
1	2	56	3	14	1	0	6135.17
1	2	57	3	13	1	0	4267.92
1	2	57	3	4	3	1	2516.56
2	1	51	3	8	1	0	3693.32
1	2	57	2	7	3	1	2762.79
1	1	55	2	4	2	0	5508.01
3	1	41	1	8	3	1	5495.05
1	2	56	1	8	1	1	3911.1
1	2	57	2	10	3	1	4596.96
1	2	56	1	7	1	1	8811.2
1	2	51	2	18	3	1	7994.34
1	1	46	3	9	1	0	4770.3
1	1	57	3	4	1	0	17783.5
1	2	29	2	11	1	0	3091.8
1	1	57	2	8	3	1	3248.6
1	2	50	3	16	1	0	8848.15
1	1	58	1	7	1	0	5865.47
1	2	53	1	4	3	0	4134.11
1	2	54	2	6	1	1	4273.49
1	2	53	1	11	1	0	8439.87
1	1	58	1	11	2	0	6825.16
1	2	55	2	5	1	1	3991.2
1	2	51	1	8	3	1	6278.08
1	1	57	1	9	1	0	34114.1
1	2	58	2	7	1	1	4142.5
1	1	50	1	6	3	0	2698.42
2	1	58	1	6	1	0	4140.34
4	1	50	3	13	1	1	6665.8
1	1	40	3	5	1	1	3578.01
1	1	42	3	14	2	0	6851.86
1	2	56	2	11	1	0	4500.88
2	1	56	1	6	2	1	7938.25
1	2	56	3	13	3	1	5810.05
1	1	56	3	8	1	0	3003.52
1	2	58	1	8	3	0	4990.42
1	2	51	2	7	3	1	2951.32
2	2	50	3	8	2	0	3094.94
1	1	44	3	10	2	0	7884.47
1	2	58	3	12	1	0	5425.7
1	2	55	1	17	1	1	11074.6
1	1	57	2	10	3	1	4299.64
2	1	56	2	7	2	0	6271.51
1	1	49	1	19	3	1	24435.4
1	1	51	1	15	2	0	48449
1	2	54	1	8	3	0	4311.86
1	2	53	2	8	3	1	6149.84
1	2	51	1	5	1	1	4201.4
1	1	51	1	9	3	0	3584.5
2	2	54	1	4	3	0	4990.09
1	1	54	3	5	1	0	5959.72
1	2	49	3	4	3	1	4099.45
2	1	56	2	6	1	0	2394.94
1	2	56	1	6	1	0	7637.63
1	2	51	2	7	3	0	820.43
1	2	56	3	15	1	1	5734.11
1	1	56	2	8	3	1	5036.5
1	1	50	2	5	3	0	2388.69
1	2	51	1	6	1	0	3036.9
1	2	53	2	4	1	0	1517.77
1	1	54	2	11	3	1	7533.03
8	1	53	2	10	1	0	2447.77
1	2	55	2	7	2	0	8375.55
1	1	54	1	4	3	0	3483.62
1	1	56	1	10	3	0	62566
1	2	58	3	17	1	1	10510.9
1	1	48	2	7	3	1	3199.93
2	2	56	1	15	1	0	7519.95
1	1	54	2	10	2	0	9640.01
1	2	58	2	10	3	1	6217.9
3	2	56	3	12	1	1	5103.83
2	2	57	1	9	2	1	4425.44
1	1	56	2	6	2	0	7670.5
1	2	58	2	4	3	0	3797.5
1	2	50	2	13	3	0	3978
1	1	56	3	13	2	0	14603.3
1	2	46	3	4	1	0	2060.6
1	1	55	2	18	2	0	76436.6
1	1	45	2	18	3	1	8802.75
1	2	51	1	7	1	0	5736.8
1	1	52	3	9	2	0	13454.1
1	2	56	2	4	3	0	2739.78
8	1	51	1	7	3	0	3915.78
1	2	54	1	15	1	0	6855.95
1	2	57	3	4	3	0	1957.14
1	2	48	1	5	3	1	3197.9
1	2	57	3	8	1	1	5742.24
1	2	39	2	6	3	0	3381.83
1	2	58	2	8	3	1	5041.71
2	1	56	1	8	2	1	5399.2
1	2	50	3	15	1	0	5621.3
1	2	51	2	20	2	0	21934.4
2	2	58	1	6	1	0	5448.98
1	2	49	2	8	2	0	6958.8
1	1	58	1	12	3	0	11272.4
1	1	56	2	6	3	0	1999.61
1	2	39	1	4	1	0	2921.52
1	1	46	1	6	1	0	42369.9
1	1	42	1	4	1	0	2523.02
1	1	57	2	14	3	0	44153.1
1	2	58	2	13	2	0	16654.2
1	2	52	1	6	3	0	3752.48
1	2	32	1	5	3	1	5061.67
1	2	56	2	8	3	0	4480.34
1	1	56	3	11	1	0	7064.97
1	1	48	3	19	1	1	6107.64
1	2	46	2	6	1	0	3508.92
2	2	58	1	7	1	0	5581.62
1	2	53	2	4	1	1	8346
1	2	44	2	6	3	0	4843.32
1	2	50	1	8	3	1	5354.53
1	2	54	2	4	3	1	2724.52
8	1	49	2	9	3	0	2992.85
2	1	55	1	7	3	1	3097.64
1	2	51	2	16	3	0	11693.9
4	1	51	3	7	3	0	4207.97
2	2	57	1	5	3	0	3114.54
3	1	51	1	7	3	1	4786.39
1	1	56	2	7	2	0	7041.61
1	1	41	1	5	3	0	3464.67
1	1	58	3	14	1	0	5254.69
2	1	45	1	7	1	0	5538.72
1	2	53	3	13	1	1	7827.14
1	1	51	2	9	1	1	5580.41
1	1	50	3	6	3	0	3279.4
1	2	48	2	8	3	1	5022.94
1	1	39	1	6	3	1	3365.53
1	1	37	1	9	1	0	4662.07
1	2	57	3	7	2	1	3425.65
1	2	52	3	5	2	0	4762.83
2	1	47	3	6	2	0	4807.56
4	2	51	1	6	1	0	5357.15
1	1	38	3	4	1	1	3095.1
1	2	37	2	13	3	0	5893.4
1	1	54	2	13	2	0	67379.8
1	2	35	2	21	2	0	42242.1
1	1	48	2	8	2	0	13197.6
1	1	51	3	9	1	0	6840.58
1	1	56	2	18	2	0	12825.5
1	2	56	2	6	3	0	3214.94
2	2	49	2	13	3	0	4100.51
1	2	58	1	4	3	0	3957.62
3	2	58	2	9	1	0	3910.78
1	1	55	3	4	1	1	4641.05
1	1	49	3	10	1	0	3864.55
1	2	58	1	6	3	1	4062.9
1	2	52	1	4	1	0	3087.11
2	1	51	2	13	3	0	6920.83
1	1	35	3	10	3	0	4800.19
1	1	55	2	12	1	1	11472.2
2	2	58	3	12	1	1	4045.04
1	1	44	2	7	1	0	4012.4
1	2	57	3	14	1	0	5331.32
2	1	49	1	7	1	0	3949.21
1	2	54	2	6	1	1	3988.93
1	2	57	3	13	1	0	4955.27
1	1	50	1	16	3	0	19161.8
1	2	56	3	10	3	1	6346.97
1	1	57	2	4	3	0	2824.47
1	2	58	2	11	3	1	4822.59
1	2	44	2	7	3	0	4208.9
1	1	57	1	7	2	0	7256.96
1	2	64	2	5	3	1	1828.25
2	2	60	3	15	1	0	5437.44
2	1	63	1	6	3	0	5173.66
1	1	59	3	4	1	1	3313.4
4	2	62	2	6	3	0	2613.88
1	2	62	2	14	3	1	13232.2
2	1	65	3	14	1	0	3927.98
1	1	61	2	6	2	0	3431.8
1	1	63	3	10	2	1	3852.03
1	2	63	3	15	1	0	4612.12
1	2	61	2	8	3	1	4418.32
1	2	59	2	4	3	1	3420.77
1	1	62	1	7	3	0	4943.64
1	1	62	2	11	2	0	10544.6
5	2	62	1	5	3	1	3790.1
1	2	62	2	10	3	1	11150.2
1	2	60	1	6	3	1	4273.99
1	1	63	3	6	3	0	3079.15
1	2	60	2	6	3	1	3249.66
1	2	59	3	6	2	1	6667.29
1	1	64	1	7	3	1	3885.15
1	2	63	1	5	1	0	4820.66
1	2	62	3	7	1	0	2762.91
3	2	64	1	4	1	1	3170.41
1	1	62	3	8	1	1	5006.53
1	1	60	3	8	2	1	15454.3
1	1	61	1	7	3	1	5133.45
1	2	61	3	10	3	1	4540.6
4	2	65	1	5	1	0	2438.86
1	2	63	3	15	1	1	4622.96
1	1	63	2	5	3	1	3130.89
1	2	63	1	7	1	0	5386.83
1	2	59	1	6	3	0	2792.1
1	1	59	2	9	3	1	4485.79
1	1	63	2	7	1	1	4191.2
1	1	62	1	7	3	0	5963.58
2	2	62	2	9	3	1	3037.89
1	2	59	1	6	1	0	2896.74
1	2	63	2	7	3	1	3610.44
1	2	62	1	10	3	1	5396.99
1	1	62	2	9	2	0	12961.5
1	2	64	1	7	1	0	7231.13
2	1	59	2	14	3	0	53768.2
1	1	62	3	4	1	1	3427.2
8	2	60	2	5	3	0	3890.87
6	2	61	2	8	2	0	3561.37
4	2	60	1	11	3	0	4802.81
1	2	62	3	7	3	0	3085.94
1	2	61	3	6	2	1	3560.07
1	1	65	3	6	1	0	3647.6
1	1	62	1	9	3	0	6898.6
4	2	59	2	8	1	0	5461.69
1	2	65	2	6	1	0	4094
1	2	59	3	9	1	0	5273.13
1	2	61	3	5	3	0	3579.42
1	2	63	2	8	3	1	4196.99
4	2	64	3	10	3	1	4829.04
1	2	63	3	13	3	0	7610.49
1	2	65	1	6	3	1	7893.41
2	2	59	1	6	1	0	3999.32
1	1	59	1	7	3	1	3787.7
1	2	60	2	6	1	1	6343.68
1	1	60	2	5	1	0	3811.6
1	2	63	3	12	3	1	3977.8
1	2	61	3	10	3	0	5728.09
1	1	65	2	10	1	0	5963.22
1	2	65	2	8	1	0	3740.15
1	1	62	2	5	3	1	3228.62
1	2	60	3	9	3	0	6265.3
1	2	63	3	6	1	0	3314.32
1	1	59	2	4	3	0	5351.15
1	2	59	1	9	1	0	4896.6
1	2	62	1	12	3	1	4264.66
1	2	63	3	13	2	0	4493.35
6	2	65	2	6	3	0	2945.77
1	1	63	1	9	3	0	9229.2
1	1	62	2	8	1	0	5010.9
1	1	59	3	17	1	0	3593.31
1	2	65	2	8	1	1	6385.05
1	2	64	1	28	3	1	10412.2
1	1	63	1	14	3	1	7748.34
2	2	62	1	7	3	0	4812.66
1	1	65	3	8	2	0	7519.63
1	2	64	2	6	2	0	4516.32
1	2	64	2	4	2	0	3586.6
1	1	61	1	5	1	1	3962.07
1	1	63	1	8	3	1	7250.99
1	2	64	1	9	3	1	5011.58
1	2	60	2	4	3	0	2855.34
1	1	63	1	7	3	1	6381.19
3	2	60	1	18	3	0	7787.45
1	2	60	1	11	1	0	9458.94
1	1	63	1	9	2	0	15513.4
1	2	64	2	4	1	0	3385.67
1	2	62	3	12	3	1	6138.11
2	1	64	2	11	1	0	1609.02
1	1	60	3	4	2	1	54
1	2	62	3	7	3	0	4397.57
1	1	59	2	6	3	1	3194.25
1	2	61	3	10	1	1	3432.21
5	2	65	2	16	3	0	5246.86
1	2	60	2	9	3	1	3030.4
2	1	65	2	10	3	0	4940.08
1	1	64	1	7	2	0	3815.52
1	2	62	1	10	1	0	5717.1
2	2	63	1	12	1	0	7329.44
1	2	62	3	6	1	0	7071.8
1	2	64	2	13	1	1	6099.1
1	2	63	2	10	3	0	4549.23
1	2	64	2	9	3	1	5289.5
1	1	59	3	4	2	1	2930.46
1	1	63	3	10	2	1	3565.7
1	1	64	2	7	3	0	3478.09
1	2	62	2	13	1	0	4954.03
1	1	61	1	6	2	0	12006
1	1	61	1	5	1	0	3949.98
4	2	62	1	7	3	1	4386.44
1	2	61	3	8	3	1	3835.1
1	2	62	2	7	1	1	4790.48
1	1	61	3	14	1	0	5374.19
1	2	65	3	7	3	1	4444.39
3	2	59	1	8	1	0	4907.19
3	2	64	2	6	1	0	1684.56
2	2	65	1	8	3	1	5987.67
2	2	61	1	9	1	0	5851.72
1	2	64	2	7	3	1	4059.14
2	2	63	2	8	3	1	3641.47
1	2	65	2	11	1	0	5462.3
1	2	61	3	11	3	0	7733.91
1	2	63	3	11	3	1	5481.85
1	2	63	1	11	1	0	7422.96
1	2	59	2	6	1	1	3608.5
1	2	60	2	14	3	1	17601.9
1	2	64	1	7	1	0	6160.98
1	2	62	3	9	1	1	5560.4
1	1	59	2	13	1	0	12630.5
1	2	63	1	6	1	0	4647.6
1	2	65	1	5	1	1	4408.47
1	2	59	2	13	1	0	7422.14
1	2	59	2	7	3	1	3077.35
1	2	65	2	6	1	1	2995.65
1	2	64	3	7	1	0	4912.68
1	2	60	1	9	1	0	3469.36
1	2	59	3	4	1	0	2778.7
1	1	61	2	7	1	1	3509.1
1	2	64	2	24	3	1	10766.3
4	2	63	3	7	3	1	4276.64
4	2	63	3	10	2	0	4008.73
4	2	62	3	6	1	1	4868.29
1	1	63	3	9	1	1	3993.6
1	1	64	3	21	2	0	15165.3
1	2	62	1	6	3	0	3869.45
1	1	60	2	6	3	1	4379.28
1	2	65	2	5	1	0	4321.87
2	2	64	2	6	1	0	2338.39
3	2	64	1	10	3	1	4177.15
1	2	65	2	4	3	1	3159.4
1	2	59	2	13	1	1	6440.8
2	2	59	3	7	2	1	3595.77
1	2	61	3	7	1	1	6391.05
5	2	65	3	13	1	0	6432.26
1	2	62	2	5	3	0	1683.34
1	1	65	1	5	1	1	3573.18
1	2	61	3	6	2	1	4250.13
1	1	63	2	5	1	1	3995.93
1	2	60	2	6	3	1	3720.54
2	2	65	2	6	3	1	2592.3
1	1	60	2	6	1	1	3093.08
1	1	60	3	6	3	0	3823.23
2	2	64	1	8	1	0	5258.55
2	2	61	2	5	3	0	3706.27
1	2	62	3	6	3	0	2268.09
1	2	60	2	4	1	0	2077.1
1	2	64	1	9	2	0	5718.79
1	1	62	2	7	3	0	3459.21
1	1	60	3	10	1	1	3887.76
1	2	64	2	5	3	0	2683.24
2	2	61	2	11	3	0	4036.56
1	1	65	3	5	1	0	5353.08
1	1	64	1	15	2	0	15117.5
6	2	61	1	5	1	1	2782.73
1	1	59	2	8	3	0	4594.31
1	2	60	3	10	1	1	6346.24
1	1	60	3	7	2	1	4642.07
1	2	61	2	7	1	0	3516.15
2	2	60	1	7	3	0	6265.85
2	1	64	2	6	3	0	6342.12
2	2	60	2	4	1	0	1560.18
1	2	60	3	7	1	0	2905.77
2	2	62	2	5	3	0	3379.96
2	2	61	2	5	3	1	3310.73
1	1	65	2	14	3	1	36706
1	1	61	2	9	3	1	3218.12
1	2	64	1	9	1	1	4720.42
1	2	59	2	7	3	1	4959.75
1	2	62	2	6	3	1	3231.15
1	1	63	2	15	3	1	10692
3	2	62	2	7	3	0	5139.29
6	1	64	2	13	3	0	5159.51
1	1	62	3	5	1	1	3539.25
1	2	60	2	10	1	1	4205.08
1	2	64	2	8	3	1	3484.02
2	2	62	2	15	2	0	35968.8
7	2	61	3	7	1	0	3756.71
1	1	65	2	8	3	1	4679.66
1	2	65	3	11	1	0	4862.08
1	2	65	1	8	3	0	4153.83
1	2	65	3	6	3	0	5256.79
1	2	60	3	14	1	0	6210.45
1	2	64	3	8	1	1	5781.42
1	1	64	3	5	3	1	4093.45
7	1	62	3	8	2	1	3761.9
1	1	62	3	4	2	1	4683.26
1	2	60	2	8	1	0	4887.65
1	1	65	2	7	1	0	3926.2
4	2	65	3	12	1	0	5061.84
1	2	63	3	7	3	1	3972.66
1	2	61	3	4	1	1	5164.59
1	2	63	2	9	3	1	4902.7
1	2	64	2	7	1	0	5187.84
1	1	63	2	12	2	0	6425.5
1	2	60	3	13	2	0	4112.28
1	2	61	3	11	3	0	6144.37
2	2	65	1	12	1	0	9796.49
1	2	63	2	25	3	0	53371.7
1	2	60	3	13	1	0	4583.46
1	2	61	3	14	1	0	5623.57
1	1	65	2	7	2	0	9779.53
1	2	63	2	12	1	1	6488.94
1	2	63	3	5	1	1	4958.4
1	1	65	1	19	3	0	8067.73
1	2	64	2	13	1	1	6298.05
1	2	62	1	7	3	0	7007.52
1	1	60	3	5	1	0	3896.05
1	2	60	2	4	3	1	2656.83
1	2	61	3	7	3	1	2892.04
1	1	60	3	7	2	0	4848.96
1	1	64	3	7	2	0	5243.53
2	2	60	2	14	2	0	13486.7
1	2	61	3	7	1	1	5634.54
1	2	62	2	11	3	1	3583.57
1	2	60	2	6	3	0	3138.78
1	2	61	2	4	3	0	1895.05
1	2	63	1	12	3	0	9964.71
1	2	60	3	6	1	1	4254.35
1	2	62	2	7	3	1	21235.3
1	1	63	3	19	1	0	11136.1
3	2	60	1	9	1	1	4910.24
1	2	59	3	14	1	0	5849.7
4	2	60	2	8	3	0	2163.63
1	1	61	3	7	1	1	5499.13
2	2	62	1	13	3	0	4709.65
5	1	60	1	14	3	1	52074.4
1	2	65	3	7	2	0	7141.61
1	2	60	1	12	3	0	4319.79
1	2	60	1	4	3	0	2841.87
1	2	64	2	7	3	0	4038.04
1	1	59	2	12	3	1	7193.22
3	2	62	2	11	3	0	4722.56
4	1	62	3	4	1	1	2756.46
1	1	60	2	7	3	1	10520.6
1	2	61	3	12	1	0	6497.94
1	2	59	1	13	3	0	14155.2
1	1	62	2	9	3	1	5222.1
3	1	63	1	7	3	0	3605.1
1	1	60	3	9	2	0	5059.02
1	2	62	1	8	2	0	11531.4
2	2	59	1	4	1	1	4298.8
1	2	61	3	11	3	0	5484.2
1	1	59	3	8	1	0	4579.72
1	2	59	2	7	1	0	5011.58
1	1	61	2	7	1	0	5000.03
1	2	59	3	6	1	0	2572.94
1	2	63	1	8	1	1	7004.42
1	2	60	2	7	3	1	4227.36
15	2	61	1	4	3	1	1612.29
1	1	60	3	96	3	1	8057.03
1	2	62	3	8	1	1	3484.6
1	1	61	3	9	3	0	4872.65
1	2	65	3	10	3	1	6730.02
1	1	62	2	6	1	1	10684.4
10	2	64	2	7	3	0	8852.83
1	2	64	2	4	3	1	4041
1	2	63	2	5	1	0	3145.89
2	2	59	1	11	3	1	3434.3
1	2	61	1	6	3	0	4214.98
1	1	59	1	4	1	1	3613.4
8	2	64	2	8	3	1	2475.07
2	1	64	1	8	2	0	9861.05
1	1	63	2	10	3	1	4253.22
1	2	65	3	16	2	0	9198.04
1	1	59	1	6	1	1	4807.47
7	2	63	2	8	3	0	4516.43
1	2	64	3	8	3	1	6139.86
1	1	65	2	4	3	1	3683.07
1	2	60	2	13	3	0	7090.6
4	1	62	3	7	1	1	6554.9
1	2	64	3	6	1	1	4219.42
7	2	64	2	5	2	0	2188
1	2	62	2	7	3	1	4749.12
1	1	64	2	5	1	1	3362.72
4	2	64	3	6	3	1	3894.39
1	2	61	1	13	1	0	9196.43
1	2	60	2	19	3	1	8077.99
1	1	63	2	15	3	1	12936.8
1	2	62	1	8	2	0	4791.45
1	2	61	2	4	1	1	2822.3
1	1	59	1	6	3	1	5176.62
1	2	65	2	9	1	1	4063.91
1	1	59	2	5	3	1	1704.46
3	2	65	1	7	3	0	5414.94
1	1	65	1	13	3	0	6653.01
1	2	61	1	7	1	0	4937.69
1	2	65	3	11	1	0	5487.81
2	2	63	3	9	1	1	2904.61
1	2	64	3	5	3	1	3769.72
1	1	60	1	6	1	0	5456.24
1	2	59	2	4	3	1	3452.89
1	1	60	1	5	3	1	3176.56
2	2	62	2	15	1	0	8871.97
1	2	59	3	8	1	1	3327.16
1	1	59	3	9	3	0	6117.67
6	1	62	2	6	1	0	2509.53
1	1	60	2	5	1	0	3913.47
1	1	64	2	6	1	1	3678.4
1	2	60	2	15	3	0	4330.59
1	1	62	3	4	2	0	2107.25
1	1	63	2	8	3	1	5440.7
1	1	59	3	4	1	0	3420.03
1	2	65	2	7	3	1	2802.07
1	1	62	2	26	1	0	12498.8
1	1	65	3	9	2	1	5955.76
1	2	59	3	10	1	0	3980.28
1	2	63	1	6	3	0	2852.04
1	2	59	1	4	1	0	5757.22
1	2	63	2	9	1	1	4466.32
1	2	61	2	4	3	0	4009.61
1	1	64	3	15	1	0	13190.2
1	2	62	2	9	3	1	5282.9
5	2	65	2	6	1	0	2557.78
1	1	65	1	13	1	1	7785.07
1	1	61	1	10	3	1	2085.53
1	2	65	3	9	2	1	8605.67
1	2	65	2	5	3	0	5320.43
2	1	60	3	5	1	0	3936.56
1	2	62	1	10	3	1	5125.89
1	2	59	2	7	1	0	5328.34
1	1	59	3	18	1	1	6551.5
1	2	61	1	14	3	0	4720.32
1	2	65	2	5	3	1	4024.8
1	2	62	2	11	3	0	45255.2
1	2	63	3	7	1	0	2802.18
1	1	62	1	7	3	0	5196.4
1	1	60	2	10	3	0	4923.96
2	2	64	3	18	2	1	10278.9
1	2	65	1	12	3	1	8161.51
1	2	63	1	13	1	1	7183.94
1	2	64	1	13	2	0	7997.71
1	1	60	2	10	3	0	4029.4
4	2	64	2	11	3	0	3430.15
1	1	61	3	6	1	0	3157.49
1	1	63	3	6	3	1	3837.07
2	2	65	1	8	3	0	6468.76
1	2	65	3	9	3	0	4464.32
1	1	59	2	6	1	1	4200.3
1	1	61	2	5	3	1	2895.69
2	1	64	3	29	1	0	13167.4
1	2	64	2	6	3	0	2318.03
1	2	60	2	9	3	1	3674.2
1	1	61	2	7	3	1	5391.3
4	1	60	2	6	1	0	6447.81
1	1	61	2	8	3	1	6196.61
1	2	62	3	16	2	0	9470.24
9	1	64	2	7	2	0	2650.1
1	2	63	3	4	2	0	5846.79
1	1	64	3	7	1	0	4000.06
1	2	63	3	9	1	0	4572.48
1	2	64	3	8	1	0	5774.82
1	1	60	3	9	1	1	5375.38
1	1	65	2	14	2	0	11494.4
1	2	61	3	14	1	1	8535.71
3	2	65	3	16	1	0	5482.72
1	1	60	2	8	2	0	4124.96
1	2	61	1	10	3	0	5597.3
1	1	59	1	9	2	0	9569.13
1	1	60	3	11	1	1	6763.78
1	2	61	2	12	3	1	8297.83
1	2	60	3	9	1	0	2751.23
1	2	64	1	15	3	0	9147.53
1	1	63	3	5	1	1	4481.34
1	2	63	1	12	1	0	6767.95
1	2	64	2	7	1	1	3686.7
1	2	65	2	7	3	0	3492.77
1	2	62	3	7	3	1	3303.03
1	1	64	3	9	2	0	5176.13
1	2	64	3	10	3	1	6262.93
1	2	60	1	10	1	0	5389.37
4	2	61	3	10	1	1	5121.16
1	1	63	2	8	3	1	3603.42
1	1	61	2	8	1	0	10109.3
1	2	64	3	8	1	1	3589.35
1	1	63	2	11	2	0	9108.9
1	2	60	3	6	1	1	5714.52
2	1	63	1	5	2	0	4774.35
2	2	65	2	8	1	0	4344.7
2	2	62	3	19	2	0	6140.62
10	1	64	1	6	2	0	2652.62
1	2	63	3	12	2	1	10148.7
1	2	59	2	6	1	1	3767.1
1	2	63	3	13	1	0	5896.23
1	1	64	1	6	2	1	5086.87
1	1	59	2	4	1	0	1850.48
1	1	65	2	11	3	1	5898.16
1	1	65	3	16	1	0	5945.57
1	2	59	3	12	1	0	4839.23
1	2	64	2	7	3	1	4931.82
3	2	65	3	14	2	0	5540.45
1	2	62	3	8	3	0	7090.8
1	1	63	3	4	1	0	2417.79
1	2	62	2	6	1	1	4484.19
2	2	62	1	4	3	0	2497.78
1	1	61	3	15	2	1	34523.9
5	2	63	2	11	3	0	5350.23
4	2	65	3	7	1	0	4683.51
4	2	62	1	12	1	0	7022.9
1	2	64	2	5	3	1	3202.5
1	2	64	2	4	3	1	3534.21
1	2	64	2	8	1	0	4409.03
2	1	64	3	10	1	1	6983.53
1	2	61	3	7	3	1	4050.7
1	1	62	3	8	2	1	6944.8
1	1	64	3	7	1	0	4162.6
5	1	63	2	9	3	0	5725.72
1	2	63	1	6	3	0	2803.18
1	1	65	3	5	3	1	2868.03
1	1	61	3	18	3	1	6654.81
1	2	60	3	9	3	1	5256.03
1	2	59	2	5	1	0	3832.87
1	2	59	1	12	3	0	7633.29
1	2	64	3	7	2	1	4663.36
1	2	63	3	7	3	1	3984.1
1	2	64	1	5	3	0	2688.89
1	2	64	2	8	1	0	8623.7
1	1	62	2	4	1	0	2880.5
1	2	59	2	11	1	1	6411.55
1	2	65	3	5	3	0	2062.62
1	2	62	1	5	3	0	2619.1
3	1	64	1	7	1	1	4844.92
1	1	63	2	6	2	0	4105.22
1	1	62	2	7	3	1	3510.52
4	1	63	3	9	2	0	3884.12
1	2	65	2	13	3	1	5654.3
1	1	62	1	8	2	0	8720.4
1	1	61	3	8	1	0	4318.97
1	2	64	3	13	1	0	4349.32
1	1	63	3	13	1	0	5512.83
3	1	65	1	9	2	0	6053.27
1	1	59	1	5	1	0	2900.22
1	2	62	2	6	3	1	8618.81
1	2	65	3	7	1	1	4989.9
1	2	63	2	7	3	1	4316
1	2	61	3	8	1	0	3290.53
1	1	62	3	10	1	0	4882.63
1	1	63	2	12	3	1	3817.3
1	2	64	3	16	2	0	11409.6
6	2	60	2	6	3	0	2749.86
1	1	61	2	10	3	1	6298.96
1	2	65	2	4	3	1	2490
1	1	62	2	17	3	0	6293.64
1	1	59	3	6	2	1	7475.54
1	1	59	2	5	3	1	3869.5
2	1	60	2	4	1	0	1916.31
2	1	59	1	15	2	0	4985.33
1	1	60	1	13	2	0	14315.2
1	2	60	1	9	1	0	6484.87
1	2	64	3	8	3	0	6057.27
4	1	60	3	6	1	0	2438.4
1	1	59	1	13	2	0	14551.5
1	1	59	2	10	2	0	11090.5
1	1	63	1	4	3	0	2451.71
1	2	64	2	9	3	0	3325.51
1	2	62	3	7	3	0	4235.79
1	1	61	2	5	3	0	3858.7
1	2	62	3	6	3	1	4441.72
1	2	62	2	8	3	1	8213.44
1	2	65	1	9	3	0	5426.11
3	2	61	2	6	3	0	2206.04
2	2	63	1	7	1	0	4469.28
1	2	63	3	27	2	1	5934.68
1	1	62	2	5	3	1	2496.07
1	2	63	1	6	3	0	4373.43
1	2	64	2	4	1	1	2933.8
2	1	65	2	6	3	1	2894.06
1	2	65	3	7	3	0	4388.37
2	2	65	3	12	1	0	5423.99
1	2	63	3	10	1	0	4766.27
1	2	59	1	9	1	1	6069
2	2	60	1	20	2	0	20161.6
1	2	63	1	8	1	1	4509.3
2	1	63	1	9	2	0	6983.97
1	2	60	1	6	1	1	4424.6
1	2	59	2	12	1	1	5263.57
1	2	61	3	11	1	1	3866.88
1	1	63	2	4	3	1	3775.28
1	2	64	1	9	1	1	5315.22
2	2	59	1	10	1	0	7567.61
1	2	64	2	13	2	0	10374.8
1	1	65	2	7	3	0	6990.43
1	2	63	3	11	2	0	8831
1	2	65	2	9	2	0	9922.63
1	2	63	2	12	3	1	5697.48
1	2	60	3	15	1	0	6897.19
3	2	65	1	7	3	0	8654.36
1	1	65	1	5	3	0	3347.55
2	2	64	3	9	3	0	7323.11
1	2	61	3	9	3	0	4879.52
46	2	64	2	11	3	0	3701.89
4	1	61	2	11	3	0	49010.7
1	2	59	3	6	1	1	3057.61
1	1	62	3	15	2	0	8854.42
1	2	61	2	4	3	1	4007.8
4	2	60	3	7	2	0	2684.58
1	1	63	1	8	3	0	5537.93
1	2	64	3	10	1	1	4911.99
4	1	60	3	10	3	1	6230.04
1	2	64	3	7	3	1	2925.05
1	1	61	1	6	3	0	5375.36
1	2	59	3	6	3	1	3509.5
1	1	64	1	5	3	1	3300.26
1	2	59	3	6	3	0	23561.4
1	2	60	3	8	3	1	3884.71
1	2	59	1	5	1	0	5036.42
1	2	64	3	10	2	1	5664.13
1	2	65	3	17	1	1	6021.48
1	2	62	2	13	1	1	5800.1
1	1	63	3	4	1	0	4337.6
1	1	61	3	18	2	0	5158.23
1	2	64	3	4	1	1	3738.89
4	2	65	2	9	3	0	4723.18
1	2	65	2	6	1	1	4957.23
1	1	62	1	15	3	1	18414
1	1	64	2	13	3	0	7271.66
2	2	64	3	14	2	1	4892.15
1	1	60	2	8	3	0	4503.48
1	2	65	1	6	3	0	5073.22
1	2	60	3	11	2	0	6841.81
1	2	59	2	5	3	1	2507.84
1	2	61	2	7	1	0	4340.45
1	2	65	2	10	3	1	4977.56
1	1	65	1	4	3	0	2947.98
5	1	64	2	7	3	0	1306.18
1	2	61	2	11	2	0	14006.4
1	1	63	2	11	2	0	9856.12
1	2	62	2	6	3	0	50436.7
1	2	64	2	13	3	1	8993.58
2	2	59	1	6	3	0	2823.74
1	1	64	3	4	1	0	3367.15
1	1	59	3	14	1	0	8434.62
1	2	59	3	7	1	0	3820.06
1	2	62	2	10	2	0	5329.4
1	2	65	3	10	3	0	3954.86
1	2	65	1	5	3	1	2664.7
1	1	61	3	5	3	1	5012.57
1	2	64	3	6	1	1	3258.96
1	2	63	2	9	3	0	7609.83
1	1	61	2	10	1	1	4447
1	2	59	2	6	3	0	4198.94
1	1	61	1	4	1	1	3713.97
1	2	64	3	5	1	0	3465.62
18	2	61	1	4	1	0	3868.06
1	2	63	3	11	1	0	6263.15
2	2	60	2	5	1	0	2822.87
1	2	64	1	5	1	1	3550.77
2	2	62	2	7	3	0	3344.36
1	1	64	2	8	1	0	1890.47
1	1	59	3	9	2	1	4919.19
3	1	64	2	5	1	0	2739.96
1	1	60	2	4	2	1	3016.4
1	2	59	3	17	1	1	6061.54
2	2	65	3	9	3	0	4009.03
1	2	59	1	7	1	0	6111.92
1	2	61	1	4	1	0	3273
1	1	63	3	8	1	0	5055.51
1	2	63	3	7	1	0	2965.81
1	2	63	2	13	1	1	9111.45
1	2	65	2	11	3	0	4457.34
1	2	62	2	10	1	1	7044.06
1	1	62	3	5	1	1	44766.9
1	2	59	2	8	2	0	4065.75
1	2	62	1	6	1	0	5508.62
1	2	61	2	6	3	0	3940.66
1	2	59	2	6	1	0	4038.4
1	2	60	2	14	3	0	37811.3
1	2	65	3	6	1	1	3138.25
1	2	63	3	7	3	1	4361.26
1	1	64	3	14	2	0	6106.96
1	1	59	3	5	1	0	5450.24
1	2	62	2	14	3	1	9238.55
1	2	65	3	10	2	0	15029.1
1	1	65	2	14	3	1	8549.85
1	1	63	1	8	2	0	5421.88
1	1	63	3	4	1	1	3276.73
1	2	64	2	10	3	1	3994.59
1	2	60	3	6	1	0	3545.96
1	1	60	1	5	3	0	4759.45
1	2	60	3	16	1	0	6143.41
1	1	63	2	14	3	1	6498.6
1	2	64	3	5	3	1	2774.48
1	1	61	2	9	1	1	3776.66
2	1	59	3	7	2	0	4668.39
1	1	63	3	10	1	0	3385.97
1	2	64	3	7	1	1	4143.5
1	2	65	3	14	1	0	4021.92
1	2	62	1	18	2	0	7722.41
1	2	62	2	7	1	1	3382.6
3	2	65	2	20	3	0	8663.9
2	1	63	2	5	3	1	3658.32
5	2	61	1	15	2	0	4872.24
1	2	64	3	7	1	1	3897.23
1	2	60	2	10	3	1	4729.82
1	1	64	2	6	1	1	4487.6
1	1	61	2	11	2	0	7367.09
1	2	64	1	7	1	1	4828.42
1	2	61	3	8	1	0	4062.2
1	2	63	2	6	3	0	3368.2
1	2	62	3	11	1	1	4868.82
1	1	64	2	26	3	1	6671.27
1	1	61	3	18	1	0	9620.22
2	1	63	1	5	1	0	2732.89
1	1	65	2	6	1	0	4363.8
1	2	64	1	16	1	0	7455.67
4	2	63	1	7	3	0	4998.01
1	1	63	2	10	2	1	5705.48
1	2	64	1	6	3	0	7259.08
1	1	62	3	9	1	0	5479.09
1	2	64	3	11	1	1	7192.98
1	2	65	3	7	2	1	3801.69
1	1	62	1	5	3	1	4972.39
1	1	61	1	8	2	0	8832.14
1	2	64	1	10	3	0	9105.92
1	1	63	3	4	3	0	2641.39
1	2	59	1	14	3	0	8011.77
1	1	60	2	7	1	0	4415.15
5	2	63	2	11	1	0	3431.94
1	1	65	3	9	1	1	7861.39
1	1	59	1	8	2	1	7805.43
1	1	60	3	5	3	1	3500.35
1	2	64	3	17	1	0	8469.47
1	2	61	3	8	1	0	2859.08
1	1	62	1	6	3	1	6272.73
1	1	63	3	8	1	0	4378.21
1	2	64	1	7	3	0	3284.26
1	1	59	2	6	2	0	9456.62
1	2	60	2	13	3	1	6052.64
1	2	59	3	16	1	0	5605
1	2	64	3	10	1	1	6676.38
4	1	61	3	12	2	0	5625.5
2	2	63	2	5	1	0	3589.06
1	2	64	2	12	3	0	7987
1	2	60	2	13	2	0	11623.9
1	2	64	2	7	1	1	3046
1	2	60	1	9	2	0	8529.81
1	2	61	2	12	1	0	5276.75
1	1	60	2	8	3	0	4226.75
2	2	64	3	10	2	0	5875.81
1	2	60	2	13	1	1	7477.59
1	2	61	2	21	2	0	7817.15
8	1	62	3	7	2	1	2410.49
1	2	62	2	13	3	0	8779.67
1	2	62	3	14	1	1	4889.93
1	2	65	1	5	3	1	3681.74
1	2	65	3	17	3	1	9259.14
1	1	65	3	9	1	0	4815.17
1	1	61		9	1	0	4835.28
6	2	63	2	7	3	0	2862.28
1	1	63	3	12	1	1	5091.68
1	2	62	2	9	3	1	5466.1
1	2	61	2	6	3	1	1735.77
1	2	63	1	8	3	0	4223.47
2	2	62	3	16	2	0	8828.84
1	2	61	2	8	3	0	6251.93
5	2	65	2	11	3	1	3784.5
8	1	64	1	6	1	0	4461.15
1	1	64	2	4	3	1	2885.41
1	1	62	3	10	1	0	4520.89
1	1	64	2	16	1	0	8914.04
1	1	60	2	7	3	1	3585.45
1	2	64	3	10	1	1	3900.3
1	1	63	3	7	3	0	3728.91
1	2	63	3	14	1	0	5363.65
1	1	60	3	4	1	1	5299.2
1	2	65	1	9	3	1	5306.57
1	2	59	2	10	3	1	3912.29
8	2	64	2	7	3	0	2365.69
1	1	64	2	5	3	1	1830.6
1	1	63	2	8	2	0	38670
2	1	61	3	7	3	1	6284.79
1	2	65	3	10	3	1	3523
1	2	65	2	8	3	0	3952.68
1	2	60	2	4	3	1	2166.58
1	1	62	1	7	3	1	3717.24
1	2	63	2	7	3	1	4872.27
1	2	64	1	8	1	1	4050.75
1	1	62	1	8	3	0	5954.87
1	2	64	2	7	3	1	3109.78
1	2	61	1	9	3	1	4436.43
2	1	60	1	7	1	0	3341.84
2	1	60	2	8	1	1	6614.36
1	2	59	2	18	1	1	7637.08
1	2	59	2	14	1	1	7143.76
1	1	60	3	17	2	0	9674.01
1	2	62	2	14	3	1	15368.5
2	2	64	2	13	3	1	8267.78
1	2	64	2	9	3	1	6978.74
12	2	62	1	7	3	0	4132.22
1	1	65	3	10	2	0	14700.6
4	2	65	1	4	3	0	2854.99
1	2	63	2	7	3	0	3382.34
1	2	59	2	6	1	0	1752.19
1	2	60	3	12	1	0	6844.88
2	2	63	2	10	3	0	2436.31
1	1	60	1	4	1	0	5097.19
2	2	65	1	8	3	1	7142.52
1	2	59	1	13	1	0	6489.08
2	2	65	2	6	3	0	6785.64
1	1	61	1	5	2	0	6356
1	2	61	3	6	3	1	3283.15
1	2	65	2	5	3	0	3122.24
1	2	62	2	19	2	0	14643.6
1	2	60	1	8	3	1	6219.67
1	1	60	3	6	2	0	2554.25
3	2	61	2	8	1	1	4479.39
1	2	61	1	5	3	1	1170.84
1	2	62	1	7	3	1	5212.82
1	2	63	2	6	3	1	3509.4
1	2	60	2	13	1	0	5673.3
1	2	63	3	7	1	0	3298.26
1	2	65	1	6	1	0	4999.42
3	1	60	1	10	1	0	8994.39
1	2	61	1	9	1	0	6181.8
2	1	61	2	6	3	0	6937.25
1	1	64	3	12	1	0	3875.62
1	2	60	3	10	3	0	5999.11
1	2	65	2	9	3	0	5397.8
1	1	61	3	6	2	0	2826.73
1	2	61	3	6	1	1	4274.95
1	2	62	1	7	3	0	5746.39
3	2	63	2	7	3	0	3386.77
3	2	60	2	14	3	0	6855.34
1	2	60	1	15	3	1	16002.8
1	1	63	3	9	1	1	38239.9
1	2	61	1	7	3	1	3491.08
1	2	60	3	6	1	0	5666.8
1	2	65	3	11	2	1	13645.3
1	2	64	2	8	3	0	4704.42
1	1	63	2	7	3	1	3730.78
1	2	64	2	5	3	1	2756.53
1	1	59	3	14	3	0	6340.12
1	2	65	3	13	3	0	6937.15
1	1	59	3	5	2	0	4818.38
4	2	65	2	6	3	0	2813.19
1	2	60	3	9	3	1	4866.96
1	2	65	3	13	1	0	5683.08
2	2	63	2	7	3	0	4227.25
1	1	64	1	6	3	0	4544.01
1	2	65	2	7	3	0	5191.28
1	2	61	3	5	3	0	3895.32
2	2	60	2	9	3	1	3943.6
2	2	61	3	11	1	0	3523.9
1	1	65	2	19	3	1	10380.4
1	1	59	1	6	3	0	5503.61
1	2	61	1	7	3	0	5085.29
1	1	61	2	5	3	1	3483.28
3	2	59	1	6	1	1	4064.65
1	2	61	1	11	3	0	8747.86
1	2	59	1	5	3	1	4884.71
3	2	65	1	7	3	0	4165.12
1	1	59	3	6	2	0	10278.7
1	2	63	2	6	3	0	3734.77
1	2	61	1	8	3	1	5903.28
1	1	65	2	5	3	1	3835.6
1	2	60	3	6	1	1	5114.43
4	2	64	1	9	3	1	6568.75
1	1	60	2	10	3	1	6473.37
1	2	63	2	9	1	0	5705.87
1	1	59	3	6	1	0	4095.77
1	2	60	2	4	3	1	2052.89
1	2	65	3	11	1	0	5223.17
1	1	62	2	5	1	1	8959.6
1	2	64	1	15	1	0	6709.05
1	2	62	3	8	2	1	4626.02
1	2	65	3	19	2	0	8562.24
1	2	59	1	7	3	0	3567.31
1	2	61	3	4	1	0	2449.43
1	1	64	2	10	3	1	14279.3
1	1	65	3	13	3	1	6941.97
1	2	64	1	7	2	0	7108.09
1	2	61	1	7	3	0	7521.66
1	2	61	3	15	2	0	10908
1	1	63	3	10	2	0	15776.9
3	2	59	3	12	1	1	4866.7
1	1	60	3	7	1	0	6053.98
1	2	61	2	6	3	1	4082.95
1	2	61	3	4	1	0	3535.3
1	2	64	1	4	3	0	2341.77
1	2	63	2	9	3	1	4453.16
1	2	62	2	4	3	0	3914.06
1	1	61	2	12	3	1	8524.83
1	2	65	2	7	3	0	4398.06
1	1	62	3	7	1	1	3968.8
1	2	63	1	13	3	0	15145.1
1	1	64	3	6	1	1	3257.46
1	2	60	2	6	3	0	3118.6
2	2	62	1	8	1	0	6939.06
1	2	62	3	9	1	1	5204.79
1	2	64	2	12	2	0	10969.7
1	2	62	3	7	2	1	3330.17
1	1	65	3	9	3	0	5700.34
4	1	65	3	10	3	1	3878.22
1	2	65	1	7	3	0	3841.36
1	2	62	3	6	1	1	3399.7
1	1	60	1	4	1	0	3636.1
1	1	64	3	7	3	0	3049.2
1	2	64	1	4	1	1	3570.12
1	2	65	3	7	2	0	7082.24
4	1	60	3	6	1	1	3812.03
1	2	62	3	10	2	1	6297.22
1	2	59	3	4	1	1	8152.05
1	1	63	3	4	3	0	2878.1
1	2	63	2	7	3	0	3717.33
1	1	65	3	5	3	0	2948.12
1	2	62	2	7	3	1	10810.2
2	2	62	2	11	3	1	8075.48
1	2	62	3	8	3	0	3777.6
1	1	64	2	9	3	1	5344.89
1	2	65	3	6	3	0	3463.35
1	2	60	2	6	1	1	3634.3
1	1	64	2	7	1	1	4678.6
2	1	62	2	4	2	0	2137.99
7	2	63	2	5	3	1	2729.38
1	2	64	1	4	3	1	3592.41
1	2	61	1	14	1	0	5432.17
1	2	60	1	7	2	0	3747.54
1	2	65	3	5	3	0	2715.95
1	2	62	2	5	3	1	2200.16
1	2	63	2	6	3	1	3870.95
2	1	65	3	4	1	1	162
5	2	62	2	11	3	1	4362.44
1	2	62	3	7	2	0	12160.4
1	1	63	3	10	3	0	5785.83
1	2	63	3	7	2	0	4125.94
2	2	60	1	10	3	0	5037.79
1	2	62	1	12	3	1	5637.28
1	1	61	3	5	3	1	3568.79
2	2	65	2	6	3	0	4510.41
1	1	59	2	6	1	0	2702.9
1	2	64	3	8	2	1	5427.98
3	2	62	2	6	3	0	2879.73
1	2	65	1	24	3	0	16096.7
1	1	65	1	13	2	0	7592.57
1	1	62	2	5	3	1	3861.19
1	2	59	3	7	2	0	6005.56
4	1	64	3	5	1	1	5105.18
1	2	59	1	13	2	1	18076.8
1	1	64	3	5	3	0	4074.39
1	2	59	2	6	3	1	8129.6
2	2	65	2	15	3	1	9466.11
1	1	59	1	10	2	0	5578.37
1	1	64	3	7	2	0	7061.18
1	2	60	2	5	1	0	1074.31
1	2	60	1	5	1	0	3991.77
1	1	63	3	5	1	0	3984.36
1	2	64	3	14	1	1	6022.68
2	2	63	3	15	1	0	4853.06
1	2	62	3	9	1	1	6463.73
1	2	60	3	8	2	1	5450.89
1	2	64	3	9	3	1	3969.94
1	1	63	2	6	3	1	3404.59
1	2	61	2	9	3	1	4571.2
1	2	62	3	8	1	1	5143.1
1	2	64	3	10	1	0	4351.61
1	2	61	3	22	3	1	13163.3
1	1	64	2	7	3	1	4772.64
1	1	64	2	12	3	1	5814.02
1	2	63	3	11	2	0	7099.24
1	2	64	2	12	2	0	8629.02
1	2	64	2	7	3	1	4560
2	2	65	2	6	1	0	5234.9
1	2	62	3	8	1	0	5586.87
1	1	59	1	6	2	0	9003.92
1	1	60	1	16	1	1	13614.4
1	2	63	3	8	1	1	2783.31
1	2	60	3	6	1	0	4116.92
1	1	65	2	6	2	0	3398.6
1	1	65	2	9	1	0	4237.88
1	2	63	2	11	3	0	4748.47
1	2	62	1	8	1	1	4371.8
3	2	65	2	7	3	0	1806.37
1	1	63	2	8	3	0	2755.65
1	2	64	3	8	2	0	10852.3
1	2	61	3	10	1	0	4415.89
1	1	63	3	8	3	1	4827.02
1	2	60	2	10	1	0	9009.02
1	2	65	3	19	2	0	7587.55
1	2	65	3	9	2	1	5061.37
1	2	60	2	18	3	0	90651.3
2	2	63	2	5	1	0	7644.28
1	1	65	3	5	3	0	1985.2
3	1	62	3	4	2	1	2718.22
1	2	59	1	6	3	0	2673.45
1	1	60	2	6	3	1	5161.21
2	2	65	2	8	3	0	4766.12
1	1	59	3	11	2	1	11836.9
4	2	60	3	7	3	1	3913.48
4	1	61	3	13	1	1	7074.72
1	2	59	2	5	1	0	1766.28
1	2	65	1	7	2	0	3693.03
6	2	62	2	9	3	0	3959.23
1	2	59	3	5	3	0	2390.14
1	1	63	1	9	1	0	7833
4	1	62	1	9	3	1	5373.69
2	1	63	1	8	1	1	4292.54
1	2	62	1	5	2	0	6823.37
1	1	59	2	4	3	1	2049.11
1	2	60	3	9	3	1	7410.6
1	2	61	1	11	3	1	3707.06
1	2	61	3	7	3	0	3867.51
1	2	63	1	4	3	0	2691.05
1	2	61	2	8	3	0	7156.93
1	2	64	1	7	1	0	4284.44
1	2	65	2	4	3	0	3236.09
1	1	62	3	13	2	0	4751.6
1	1	62	3	8	2	0	3716.44
1	2	64	2	4	1	1	3301.17
1	1	62	2	5	3	1	3572.75
1	2	61	3	13	3	1	6743.88
1	2	63	3	14	2	1	7339.51
4	2	64	2	7	3	0	4683.31
4	2	63	3	14	1	0	5244.05
9	2	62	2	6	3	0	2383.84
8	2	62	2	4	3	1	2423.49
1	2	60	3	12	1	1	4654.97
1	2	62	2	4	1	0	2166.34
1	2	61	3	4	1	1	344.55
7	2	62	2	9	3	1	5006.96
1	2	63	3	6	1	1	4066.71
6	1	59	2	9	3	0	3529.76
3	2	65	2	4	3	0	28172.1
1	1	63	3	7	3	0	4160.61
1	1	62	1	7	3	0	4736.99
3	2	64	1	9	1	0	6030.15
1	2	60	3	8	1	0	2957.87
1	1	60	2	7	3	1	5479.6
1	1	65	3	11	1	1	39640.4
1	2	60	1	9	1	0	6612.44
1	2	65	3	8	3	0	6916.74
4	2	63	2	9	3	0	3751.68
1	1	61	1	6	3	0	6888.07
1	2	59	3	9	3	1	4281.8
1	2	59	3	20	2	1	14366.5
1	1	59	2	10	3	0	5891.72
4	1	60	1	9	1	0	10958.9
1	1	64	2	9	3	1	7296.62
1	2	63	3	11	1	0	2769.53
1	2	61	2	7	1	1	3950.4
1	1	61	3	7	3	0	3744.67
1	1	60	3	8	1	0	4149.94
3	2	59	1	6	1	0	2935.21
1	2	64	3	8	2	0	7114.85
1	1	59	2	13	2	1	44821.7
1	1	65	3	6	1	0	2305.62
1	2	60	1	4	1	0	2350.95
1	2	60	2	8	1	0	2678.03
1	2	63	2	12	1	1	5184
2	2	63	2	10	3	1	4287.94
1	2	62	2	10	3	1	3526.84
1	1	62	1	4	2	0	4524.95
1	1	64	1	8	2	0	6686.29
1	2	62	1	5	1	0	3610.17
4	2	60	2	9	3	0	5610.73
1	1	59	2	19	2	0	14622
4	1	60	3	4	1	0	2195.92
1	2	65	3	15	2	0	5285.27
1	1	64	2	8	3	0	9005.85
7	2	64	2	12	3	0	4855.76
2	1	61	1	6	3	0	3103.37
1	1	61	3	7	2	0	3836.71
1	2	65	3	18	2	0	13132.7
1	1	60	1	11	2	0	6045.28
1	2	63	1	18	3	1	32614.2
1	2	60	2	10	2	0	8647.19
1	2	60	2	9	3	1	3194.65
1	2	62	2	6	1	1	3248.1
6	2	65	2	8	2	0	3411.07
1	1	64	3	5	2	1	2804.66
1	1	64	2	11	3	1	7212.15
1	2	65	3	7	3	0	4334.47
1	2	65	2	6	3	1	2885
1	2	62	2	4	3	0	2422.2
5	2	60	2	6	3	0	2648.74
1	1	65	2	7	3	1	3034.17
1	2	63	2	5	3	0	2953.3
1	1	64	3	16	2	1	3077.52
1	2	61	1	4	3	1	3033
3	2	63	3	10	1	0	3782.7
1	2	64	3	10	1	0	4947.12
1	1	65	2	7	2	0	3573.1
1	2	64	2	8	3	0	2475.02
1	2	64	3	6	3	0	3497.21
2	2	64	1	5	1	0	4234.99
2	2	64	3	14	1	0	5168.97
2	1	65	1	15	3	1	5819.19
1	1	65	3	30	2	0	23354.8
1	1	60	3	4	1	1	2779.33
1	2	61	2	7	3	1	3277.09
1	2	60	2	5	1	0	2981.03
1	2	59	3	12	1	0	4780.87
3	1	59	2	9	3	0	4874.93
1	1	65	3	14	1	0	6697.16
2	1	60	1	5	3	1	30028.3
1	2	60	3	15	1	0	6299.73
1	1	63	3	13	2	0	5855.95
1	1	60	2	22	2	0	23492.7
1	2	64	3	13	1	0	4966.81
1	2	65	2	10	2	0	12446
1	1	59	1	5	3	1	4947.14
1	1	62	2	4	3	1	2929.37
1	1	61	1	6	3	0	5544.12
1	1	64	2	4	3	1	3089.37
1	2	62	3	7	3	0	2141.03
3	2	62	3	8	1	0	4885.65
1	2	59	1	23	3	1	11548.1
17	2	61	1	9	3	1	6236.15
1	2	64	2	6	1	1	4753.67
1	1	65	1	7	3	1	5793.91
9	1	62	1	4	1	0	1930.99
1	2	64	2	10	3	1	8484.17
1	2	64	2	9	3	1	4131.53
1	2	61	3	8	2	0	5800.21
2	2	63	1	11	3	0	5166.91
1	2	62	2	6	3	1	2235.6
1	1	61	1	8	2	0	44272.5
1	2	59	3	6	3	1	2765.43
3	1	62	2	5	3	1	4593.31
1	1	60	3	14	2	0	8367.33
1	1	61	3	8	2	0	9439.9
3	1	60	2	4	3	0	1928.05
1	1	60	1	5	3	0	4413.33
2	2	66	2	12	2	1	7462.26
1	2	67	1	4	1	1	5322.4
1	1	70	1	11	2	0	22504.5
1	1	69	3	12	2	0	12316.8
1	2	70	3	4	2	0	3487.25
1	2	70	1	10	1	1	6025.37
2	1	68	2	8	1	1	4993.4
2	2	70	1	4	1	0	3079.21
1	2	67	1	8	3	0	2734.89
1	2	68	2	10	3	1	3504.93
1	1	67	2	8	3	1	4285.27
1	2	68	1	10	2	0	6143.17
4	2	67	2	11	3	0	3861.72
1	2	69	2	9	3	1	3971.74
1	2	69	3	6	1	1	3847.94
1	2	66	2	6	2	0	8339.8
1	2	66	1	4	1	0	3693.08
1	2	70	2	6	3	1	5260.38
1	2	70	1	8	2	0	8847.66
[truncated: 2,636 more rows]
